# Supplementary material for: Combining DNA and protein alignments to improve genome annotation with LiftOn
Source: HighWire-hosted journal article supplement (doi:10.1101/gr.279620.124), 2024-12-27
Supplement: Supplemental_Tables.docx [file Supplemental_Tables.docx]

**Supplementary Tables for**

Combining DNA and protein alignments to improve genome annotation with LiftOn

Kuan-Hao Chao1, 2, *, Jakob M. Heinz3, Celine Hoh1, 2, Alan Mao1, 2, 4, Alaina Shumate2, 4, Mihaela Pertea1, 2, 4, and Steven L Salzberg1, 2, 4, 5, *

1Department of Computer Science, Johns Hopkins University, Baltimore, MD 21218, USA
2Center for Computational Biology, Johns Hopkins University, Baltimore, MD 21218, USA

3Department of Biomedical Informatics, Harvard Medical School, Boston, MA 02115, USA
4Department of Biomedical Engineering, Johns Hopkins University, Baltimore, MD 21218, USA
5Department of Biostatistics, Johns Hopkins University, Baltimore, MD 21211, USA **corresponding authors:* [kh.chao@cs.jhu.edu](mailto:kh.chao@cs.jhu.edu), [salzberg@jhu.edu](mailto:salzberg@jhu.edu)

| **Gene biotype** | **Number of genes in GRCh38** | **Number of genes mapped onto T2T_CHM13 by LiftOn** |
| --- | --- | --- |
| protein_coding | 19927 | 20144 |
| lncRNA | 18008 | 18723 |
| Pseudogene | 16896 | 17855 |
| miRNA | 1915 | 2383 |
| snoRNA | 1194 | 1187 |
| tRNA | 453 | 548 |
| V_segment | 239 | 244 |
| snRNA | 153 | 192 |
| J_segment | 98 | 80 |
| ncRNA | 51 | 49 |
| misc_RNA | 42 | 44 |
| C_region | 21 | 23 |
| antisense_RNA | 19 | 19 |
| other | 13 | 13 |
| Y_RNA | 4 | 7 |
| vault_RNA | 4 | 4 |
| scRNA | 4 | 4 |
| telomerase_RNA | 1 | 1 |
| RNase_P_RNA | 1 | 1 |
| RNase_MRP_RNA | 1 | 1 |
| **Total** | **59044** | **61522** |

**Table S1** The number of genes for each biotype annotated on the main chromosomes and unplaced contigs in GRCh38 and T2T-CHM13. The T2T-CHM13 annotations were generated using LiftOn by mapping the RefSeq annotations (Release 220) from GRCh38 patch 14 to T2T-CHM13 v2.0.

| Stage | Total | Coding | Non-coding |
| --- | --- | --- | --- |
| Initially unmapped | 217 | 153 | 64 |
| Aligned to any location by minimap2 | 217 | 153 | 64 |
| mapped by LiftOn | 59 | 50 | 9 |
| not mapped by LiftOn | 158 | 103 | 55 |

**Table S2** The analysis of unmapped genes from mapping RefSeq Release 220 (GRCh38.p14) to T2T-CHM13. The table summarizes the results for 217 initially unmapped genes after chromosome-by-chromosome mapping using minimap2. All 217 genes were successfully aligned to T2T-CHM13 by minimap2, but only 59 were mapped by LiftOn (50 coding and 9 non-coding). The remaining 158 genes (103 coding and 55 non-coding) were unmapped, primarily due to copy number loss, where the aligned loci were either already occupied or the alignment was too fragmented.

| **Gene Name** | **Number of extra copies** |
| --- | --- |
| gene-*LOC124905331* | 50 |
| gene-*TAF11L5* | 34 |
| gene-*USP17L11* | 25 |
| gene-*TSPY10* | 19 |
| gene-*FAM90A13* | 14 |
| gene-*FAM90A12* | 9 |
| gene-*LOC101929601* | 7 |
| gene-*FAM90A24*, gene-*TSPY4* | 6 |
| gene-*TSPY3* | 5 |
| gene-*AMY1C*, gene-*LOC124900996*, gene-*LOC124901652*, gene-*LOC124903857* | 4 |
| gene-*LOC107987371*, gene-*LOC124901646*, gene-*LOC124903544*, gene-*TSPY9*, gene-*USP17L17* | 3 |
| gene-*CLEC18B*, gene-*GOLGA6B*, gene-*LOC107987020*, gene-*LOC107987067*, gene-*LOC107987372*, gene-*LOC112268317*, gene-*LOC124900992*, gene-*LOC124901580*, gene-*LOC124901639*, gene-*LOC124901648*, gene-*LOC124901651*, gene-*LOC124901712*, gene-*LOC124904581*, gene-*LOC124905938*, gene-*LOC128966684*, gene-*NPIPB15*, gene-*PDPR*, gene-*PGA4*, gene-*TSPY8* | 2 |
| gene-*BOLA2*, gene-*CCL3L3*, gene-*CCL4L2*, gene-*DEFB103B*, gene-*DEFB104A*, gene-*DEFB105B*, gene-*DEFB106A*, gene-*DEFB107A*, gene-*DEFB4A*, gene-*DUSP22*, gene-*EIF3C*, gene-*FAM90A9*, gene-*FCGR3B*, gene-*FOXD4L4*, gene-*FRG2C*, gene-*GOLGA6L1*, gene-*GOLGA8R*, gene-*GPRIN2*, gene-*KCNJ18*, gene-*LGALS9C*, gene-*LIMS3*, gene-*LOC101927345*, gene-*LOC101929627*, gene-*LOC107985915*, gene-*LOC112268458*, gene-*LOC124901638*, gene-*LOC124901798*, gene-*LOC124903442*, gene-*LOC124903761*, gene-*LOC124904095*, gene-*LOC124905300*, gene-*LOC124905320*, gene-*LOC124907854*, gene-*LOC128966594*, gene-*MRGPRX1*, gene-*PRR23D2*, gene-*RGPD5*, gene-*SLX1A*, gene-*SPAG11B*, gene-*SPDYE13*, gene-*SPDYE9*, gene-*SULT1A3*, gene-*TPTE*, gene-*TSPY1*, gene-*USP17L7*, gene-*XAGE1A*, gene-*ZNG1C* | 1 |

**Table S3.** Distribution of extra copies of protein-coding genes identified by the Liftoff module in LiftOn of mapping RefSeq GCF_000001405.40-RS_2023_10 release annotations from GRCh38.p14 to T2T-CHM13 v2.0.

| **Gene Name** | **Number of extra copies** |
| --- | --- |
| gene-*LOC112268317* | 27 |
| gene-*LOC124903544*, gene-*LOC124902738*, gene-*IGHJ6*, gene-*KCNE1* | 1 |

**Table S4.** Distribution of extra copies of protein-coding genes identified by the miniprot module in LiftOn of mapping RefSeq GCF_000001405.40-RS_2023_10 release annotations from GRCh38.p14 to T2T-CHM13 v2.0.

|  | **Total gene count** | **Protein-coding gene count** | | | **Non-coding gene count** | | |
| --- | --- | --- | --- | --- | --- | --- | --- |
| Reference | 19,158 | 19,158 | | | 0 | | |
| Target (LiftOn) | 19,535 | *Single copy* | *Extra copy* | *Extra copy count* | *Single copy* | *Extra copy* | *Extra copy count* |
| 18,968 | 162 | 405 | 0 | 0 | 0 |
| 19,535 | | | 0 | | |

**Table S5.** Statistics for LiftOn at the gene level, as a result of mapping RefSeq MANE release v1.2 annotation from the GRCh38.p14 human genome to T2T-CHM13 v2.0 (<https://github.com/marbl/CHM13>).

|  |  | **Total feature count** | **Protein-coding feature count** | | | **Non-coding feature count** | | |
| --- | --- | --- | --- | --- | --- | --- | --- | --- |
| Transcript | Reference | 168,451 | 105,328 | | | 69,250 | | |
| Target (LiftOn) | 156,173 | *Single copy* | *Extra copy* | *Extra copy count* | *Single copy* | *Extra copy* | *Extra copy count* |
| 99,461 | 45 | 138 | 55,217 | 139 | 1,357 |
| 99,599 | | | 56,574 | | |

**Table S6.** The summary LiftOn statistics for lift-over results at transcript-levels, depicting the mapping from Human GRCh38 CHESS 3 v .3.0.1 (<https://ccb.jhu.edu/chess/>) to T2T-CHM13 v2.0 (<https://github.com/marbl/CHM13>)

|  |  | **Total feature count** | **Protein-coding feature count** | | | **Non-coding feature count** | | |
| --- | --- | --- | --- | --- | --- | --- | --- | --- |
| Gene | Reference | 35,551 | 22,192 | | | 13,359 | | |
| Target (LiftOn) | 36,525 | *Single copy* | *Extra copy* | *Extra copy count* | *Single copy* | *Extra copy* | *Extra copy count* |
| 21,507 | 198 | 840 | 13,195 | 131 | 654 |
| 22,545 | | | 13,980 | | |
| Transcript | Reference | 119,745 | 96,192 | | | 23,553 | | |
| Target (LiftOn) | 120,692 | *Single copy* | *Extra copy* | *Extra copy count* | *Single copy* | *Extra copy* | *Extra copy count* |
| 95,169 | 280 | 986 | 23,284 | 173 | 800 |
| 96,435 | | | 24,257 | | |

**Table S7** Statistics for LiftOn at both the gene and transcript levels, as a result of mapping the RefSeq GRCm39 annotation (GCF_000001635.27-RS_2023_04) from GRCm39 (C57BL/6J strain) to NOD_SCID assembly (NOD_SCID strain).

|  |  | **Total feature count** | **Protein-coding feature count** | | | **Non-coding feature count** | | |
| --- | --- | --- | --- | --- | --- | --- | --- | --- |
| Gene | Reference | 11,793 | 9,935 | | | 1,858 | | |
| Target (LiftOn) | 11,916 | *Single copy* | *Extra copy* | *Extra copy count* | *Single copy* | *Extra copy* | *Extra copy count* |
| 9,841 | 54 | 95 | 1,822 | 23 | 81 |
| 9,990 | | | 1,926 | | |
| Transcript | Reference | 26,617 | 23,471 | | | 3,146 | | |
| Target (LiftOn) | 26,797 | *Single copy* | *Extra copy* | *Extra copy count* | *Single copy* | *Extra copy* | *Extra copy count* |
| 23,287 | 83 | 144 | 3,078 | 45 | 160 |
| 23,514 | | | 3,283 | | |

**Table S8** Statistics for LiftOn at both the gene and transcript levels, as a result of mapping the RefSeq Apis mellifera annotation release 104 from Amel_HAv3.1 (GCF_003254395.2) to ASM1932182v1 assembly (GCA_019321825.1).

|  |  | **Total feature count** | **Protein-coding feature count** | | | **Non-coding feature count** | | |
| --- | --- | --- | --- | --- | --- | --- | --- | --- |
| Gene | Reference | 32,008 | 28,738 | | | 3,270 | | |
| Target (LiftOn) | 33,450 | *Single copy* | *Extra copy* | *Extra copy count* | *Single copy* | *Extra copy* | *Extra copy count* |
| 28,385 | 322 | 1039 | 3,157 | 108 | 439 |
| 29,746 | | | 3,704 | | |
| Transcript | Reference | 48,843 | 42,566 | | | 6,277 | | |
| Target (LiftOn) | 50,352 | *Single copy* | *Extra copy* | *Extra copy count* | *Single copy* | *Extra copy* | *Extra copy count* |
| 42,181 | 346 | 1047 | 6,146 | 125 | 507 |
| 43,574 | | | 6,778 | | |

**Table S9** Statistics for LiftOn at both the gene and transcript levels, as a result of mapping the NCBI RefSeq Oryza sativa Japonica Group annotation release 102 from IRGSP-1.0 (GCF_001433935.1) to ASM3414082v1 assembly (GCA_034140825.1).

|  |  | **Total feature count** | **Protein-coding feature count** | | | **Non-coding feature count** | | |
| --- | --- | --- | --- | --- | --- | --- | --- | --- |
| Gene | Reference | 31,481 | 27,562 | | | 3,919 | | |
| Target (LiftOn) | 31,525 | *Single copy* | *Extra copy* | *Extra copy count* | *Single copy* | *Extra copy* | *Extra copy count* |
| 27,390 | 134 | 224 | 3,665 | 38 | 74 |
| 27,748 | | | 3,777 | | |
| Transcript | Reference | 52,635 | 48,256 | | | 4,379 | | |
| Target (LiftOn) | 52,680 | *Single copy* | *Extra copy* | *Extra copy count* | *Single copy* | *Extra copy* | *Extra copy count* |
| 48,060 | 146 | 237 | 4,125 | 38 | 74 |
| 48,443 | | | 4,237 | | |

**Table S10** Statistics for LiftOn at both the gene and transcript levels, as a result of mapping the RefSeq TAIR10.1 annotation from TAIR10.1 (GCF_000001735.4) to Col-CEN (ASM2311539v1) assembly (GCA_023115395.1).

| **Metric** | **LiftOn** | **Liftoff** | **Miniprot** |
| --- | --- | --- | --- |
| Intron chain level (Sensitivity) | 41.2% | 41.2% | 16.6% |
| Intron chain level (Precision) | 24.7% | 24.7% | 13.4% |
| Matching intron chains | 42,849 | 42,817 | 17,238 |
| Matching transcripts | 47,369 | 47,336 | 17,684 |
| Matching loci | 22,251 | 22,234 | 10,211 |

**Table S11** The gffcompare results of the experiment mapping human (GRCh38.p14) to chimpanzee (NHGRI_mPanTro3-v1.1-hic.freeze_pri), comparing LiftOn, Liftoff, and miniprot at the intron chain level, as well as the number of matching intron chains, transcripts, and loci.

| **Metric** | **LiftOn** | **Liftoff** | **Miniprot** |
| --- | --- | --- | --- |
| Intron chain level (Sensitivity) | 29.1% | 28.2% | 13.8% |
| Intron chain level (Precision) | 22.4% | 21.7% | 14.2% |
| Matching intron chains | 27,258 | 26,394 | 12,922 |
| Matching transcripts | 30,386 | 29,439 | 14,272 |
| Matching loci | 18,176 | 17,477 | 10,616 |

**Table S12** The gffcompare results of the experiment mapping mouse (GRCm39) to rat (mRatBN7.2), comparing LiftOn, Liftoff, and miniprot at the intron chain level, as well as the number of matching intron chains, transcripts, and loci.

| Source and target genomes | GRCh38.p14 T2T-CHM13 (MANE) | *Homo sapiens* *Pan troglodytes* | *Mus musculus* *Rattus norvegicus* | *D. melanogaster D. erecta* |
| --- | --- | --- | --- | --- |
| Run liftoff and miniprot  (sec / %) | 253 / 18.55% | 3227 /  20.03% | 6959 /  40.1% | 502 /  20.68% |
| Create liftoff database  (sec / %) | 37.22 /  2.73% | 332.77 /  2.07% | 225.07 /  1.3% | 25.67 /  1.06% |
| Create miniprot database  (sec / %) | 12.95 /  0.95% | 108.6 /  0.67% | 73.89 /  0.43% | 3.26 /  0.13% |
| Protein maximization algorithm  (sec / %) | 1017 /  74.64% | 12078 /  74.99% | 9837 /  56.69% | 1871 /  77.06% |
| Finding extra copies of proteins with miniprot  (sec / %) | 0.95 /  0.07% | 7.34 /  0.05% | 5.4 /  0.03% | 1.78 /  0.07% |
| Others  (sec / %) | 41.70 /  3.06% | 352.74 /  2.19% | 251.63 /  1.45% | 24.28 /  1.00% |
| Overall time (sec) | 1,363 | 16,107 | 17,354 | 2,428 |

**Table S13.** Runtimes for key steps in mapping alignment between four pairs of genomes: (1) mapping MANE GRCh38.p14 to T2T-CHM13 (human to human), (2) *Homo sapiens* to *Pan troglodytes* (human to chimpanzee), (3) *Mus musculus* to *Rattus norvegicus* (mouse to rat), and (4) *Drosophila melanogaster* to *Drosophila erecta*. The steps include running Liftoff and miniprot, creating Liftoff and miniprot databases, applying the protein maximization algorithm, and identifying extra copies of proteins. Times are reported in processor seconds, with corresponding percentages of total runtime.
